# Supplementary material for: Shared computational principles for language processing in humans and deep language models
Source: PubMed Central journal article supplement (PMC8904253; doi:10.1038/s41593-022-01026-4), 2022-03-07
Supplement: 41593_2022_1026_MOESM1_ESM.pdf [file 41593_2022_1026_MOESM1_ESM.pdf]

**Supplementary information**

---

**Shared computational principles for  
language processing in humans and deep  
language models**

---

In the format provided by the  
authors and unedited

## Appendix I - Decoding Model Details

\*The size of the layer is dependent on the number of electrons included in the fold (5 folds over all). The number of electrodes ranged from 114-132, and the total number of parameters ranged from 219,670-228,790.

| Layer (type)                    | Output Shape               | Param #         |
|---------------------------------|----------------------------|-----------------|
| input_1 (InputLayer)            | [(None, 10,<br>*114-132X)] | 0               |
| conv1d (Conv1D)                 | (None, 8,<br>*114-132)     | 55680-64<br>800 |
| activation (Activation)         | (None, 8,<br>*114-132)     | 0               |
| batch_normalization (BatchNorn) | (None, 8,<br>*114-132)     | 640             |
| dropout (Dropout)               | (None, 8,<br>*114-132)     | 0               |
| max_pooling1d (MaxPooling1D)    | (None, 4,<br>*114-132)     | 0               |
| conv1d_1 (Conv1D)               | (None, 3,<br>*114-132)     | 51200           |
| activation_1 (Activation)       | (None, 3,<br>*114-132)     | 0               |
| batch_normalization_1 (Batch    | (None, 3,<br>*114-132)     | 640             |
| dropout_1 (Dropout)             | (None, 3,<br>*114-132)     | 0               |
| locally_connected1d (Locally    | (None, 2,<br>*114-132)     | 102720          |
| batch_normalization_2 (Batch    | (None, 2,<br>*114-132)     | 640             |
| activation_2 (Activation)       | (None, 2,<br>*114-132)     | 0               |
| global_max_pooling1d (Global    | (None, *114-132)           | 0               |

|                                 |            |                              |
|---------------------------------|------------|------------------------------|
| dense (Dense)                   | (None, 50) | 8050                         |
| layer_normalization (LayerNo    | (None, 50) | 100                          |
| <b>Total parameters</b>         |            | <b>*219,670-<br/>228,790</b> |
| <b>Trainable parameters</b>     |            | <b>*218,710-<br/>227,830</b> |
| <b>Non-trainable parameters</b> |            | <b>960</b>                   |

- Learning rate: 0.00025
- Batch size: 256
- Convolutional layers L2 regularization alpha: 0.003
- Dense layer L2 regularization alpha: 0.0005
- Dropout probability is 21%
- Weights averaged over last 20 epochs before early stopping
- Trained for a maximum of 1500 epochs with patience of 150 epochs

We used a hyperparameter search to choose depth, batch size, learning rate, patience, and convolutional filter.<sup>15</sup>

## Appendix II - Word List

|          |           |       |        |        |         |           |
|----------|-----------|-------|--------|--------|---------|-----------|
| a        | called    | have  | make   | very   | think   | who       |
| about    | camera    | he    | me     | public | this    | wikipedia |
| after    | case      | him   | monkey | really | thought | with      |
| all      | copyright | his   | my     | right  | to      | would     |
| an       | could     | how   | next   | said   | twenty  | yeah      |
| and      | court     | human | no     | saw    | two     | year      |
| andrew   | david     | i     | not    | say    | uh      | you       |
| animal   | day       | if    | now    | see    | um      | your      |
| are      | did       | in    | of     | should | up      |           |
| argument | do        | into  | on     | so     | very    |           |
| around   | domain    | is    | one    | sued   | wa      |           |
| at       | even      | it    | or     | take   | wales   |           |
| attorney | first     | judge | other  | that   | way     |           |
| be       | for       | just  | out    | the    | we      |           |

|         |        |        |            |       |       |
|---------|--------|--------|------------|-------|-------|
| because | friend | know   | over       | their | well  |
| been    | from   | law    | own        | them  | were  |
| before  | get    | lawyer | people     | then  | what  |
| being   | got    | legal  | photo      | there | when  |
| but     | ha     | like   | photograph | these | where |
| by      | had    | look   | picture    | they  | which |
